# Supplementary material for: Femtosecond Laser Engraving of Deep Patterns in Steel and Sapphire
Source: MDPI journal article supplement (doi:10.3390/mi12070804), 2021-07-07

# Steel

100 kHz

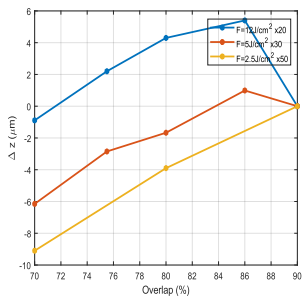

500 kHz

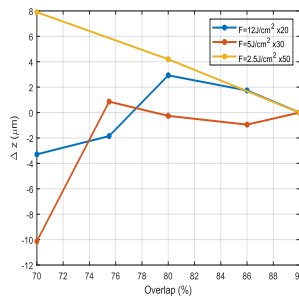

Depth change with overlap: depth at 90% is set as reference to compare its evolution with overlap at different fluences.

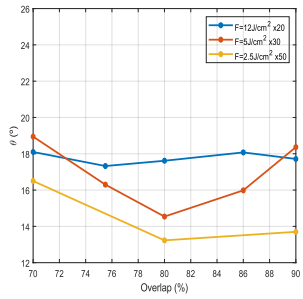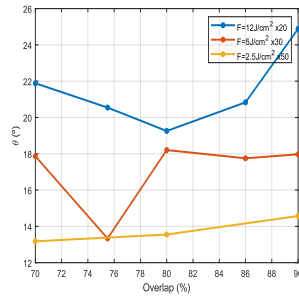

# Sapphire

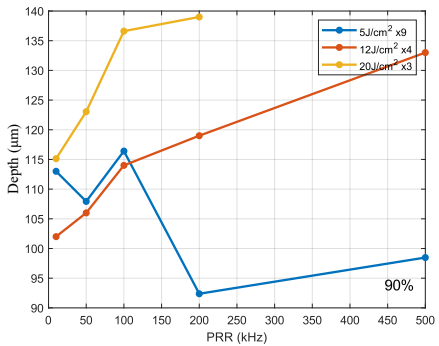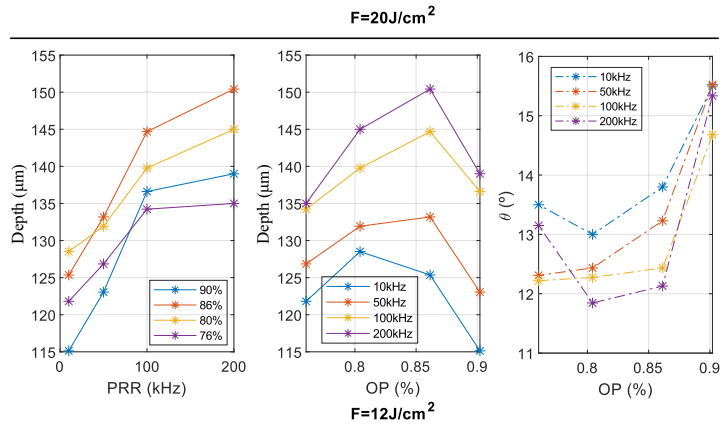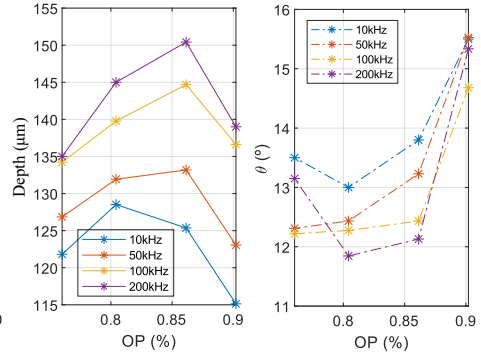

The taper angle is reduced with fluence increase and also increases for high overlaps (90%)

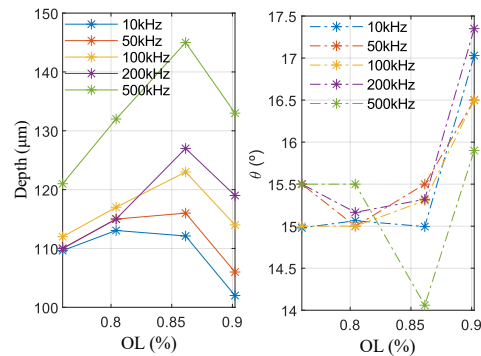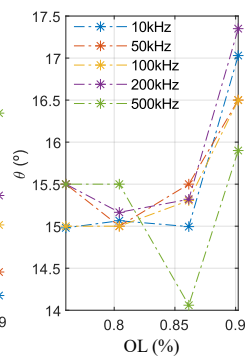

Supplement: s1 [file s1]
